# Supplementary material for: The deposition of cadmium selenide and cadmium phosphide thin films from cadmium thioselenoimidodiphosphinate by AACVD and the formation of an aromatic species
Source: Royal Society of Chemistry journal article supplement (doi:10.1039/c8dt04357d), 2019-01-01
Supplement: c8dt04357d1.pdf [file c8dt04357d1.pdf]

Electronic Supplementary Information

**The Deposition of Cadmium Selenide and Cadmium Phosphide Thin Films from Cadmium Thioselenoimidodiphosphate by AACVD and the Formation of Aromatic Species**

Temidayo Oyetunde,<sup>a,b</sup> Mohammad Afzaal,<sup>\*c</sup> Mark A. Vincent,<sup>d</sup> and Paul O'Brien<sup>†b</sup>

<sup>a</sup>Centre for Chemical and Biochemical Research (CCBR), Redeemer's University, Ede, P.M.B. 230, Osun State. 232102. Nigeria.

<sup>b</sup>School of Chemistry and School of Materials, The University of Manchester, Oxford Road, Manchester, M13 9PL, UK.

<sup>c</sup>Maths and Natural Sciences Division, Higher Colleges of Technology, P.O.Box: 7947, Sharjah, United Arab Emirates. Email: mafzaal@hct.ac.ae

<sup>d</sup>School of Chemistry, The University of Manchester, Oxford Road, Manchester, M13 9PL, UK.

<sup>†</sup>Deceased

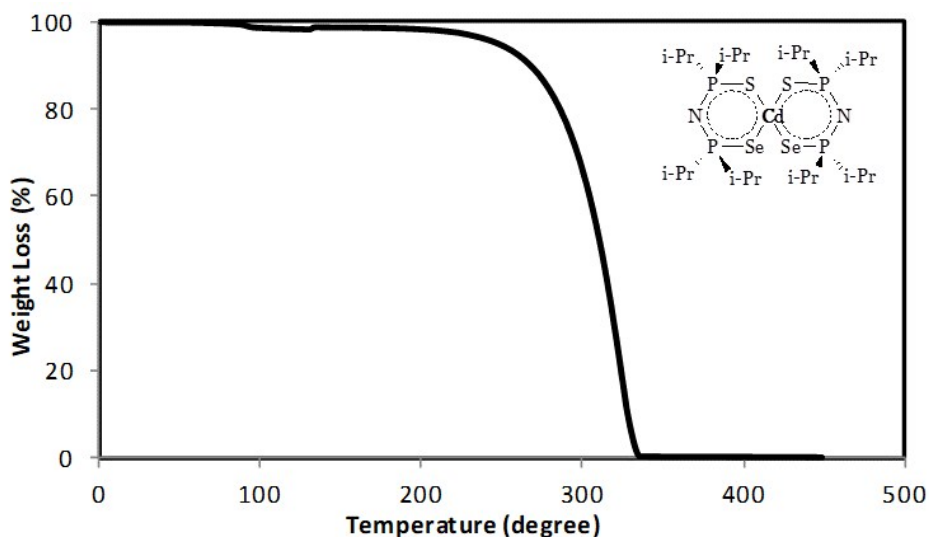

**Figure S1.** Thermogravimetry analysis of  $\text{Cd}[(\text{SP}^i\text{Pr}_2)(\text{SeP}^i\text{Pr}_2)_2\text{N}]_2$ . Inset shows the structure of precursor.

| Compound                            | Dep. Temp (°C) | Flow Rate (sccm) | Phase      | Lattice Constant (Å)                                 |                                             |
|-------------------------------------|----------------|------------------|------------|------------------------------------------------------|---------------------------------------------|
|                                     |                |                  |            | Experimental                                         | Literature <sup>1,2</sup>                   |
| CdSe                                | 525/500        | 240              | Hexagonal  | $a = 4.290(3)$<br>$c = 7.013(3)$                     | $a = 4.299$<br>$c = 7.010$                  |
| CdSe/Cd <sub>2</sub> P <sub>3</sub> | 500/475        | 160              | Monoclinic | $a = 18.035(1)$<br>$b = 4.610(3)$<br>$c = 17.854(2)$ | $a = 18.030$<br>$b = 4.610$<br>$c = 17.850$ |

**Table S1.** Lattice parameters of the deposited thin films .

| Compound                            | Dep. Temp (°C) | Flow Rate (sccm) | Cd (%) | Se (%) | P (%) |
|-------------------------------------|----------------|------------------|--------|--------|-------|
| CdSe                                | 525            | 240              | 39.3   | 30.6   | 29.8  |
|                                     | 500            | 240              | 42.4   | 34.2   | 22.7  |
| CdSe/Cd <sub>2</sub> P <sub>3</sub> | 500            | 160              | 43.4   | 33.9   | 22.5  |
|                                     | 475            | 160              | 37.2   | 34.9   | 27.1  |

**Table S2.** Compositional analysis of films determined by EDAX.

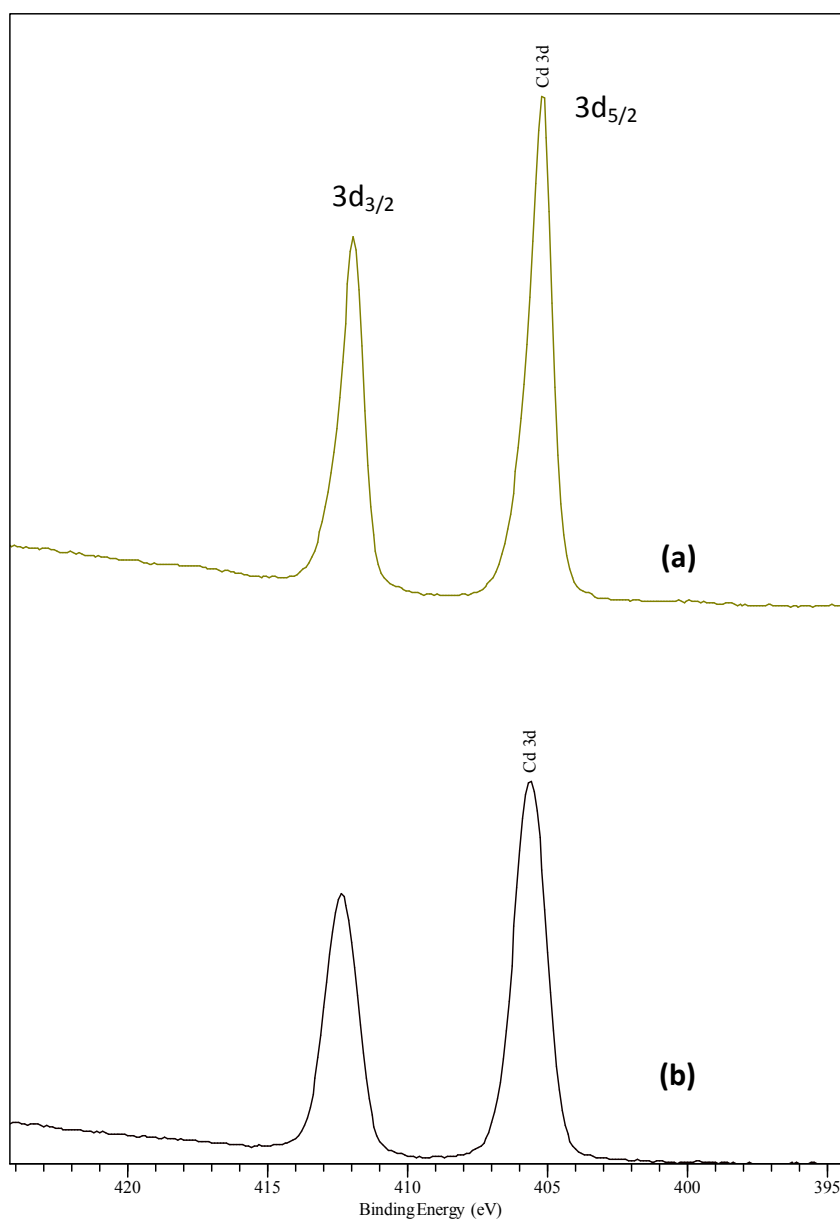

**Figure S2.** XPS of Cd 3d peaks of (a)  $\text{Cd}[(\text{SP}^i\text{Pr}_2)(\text{SeP}^i\text{Pr}_2)_2\text{N}]_2$  and (b)  $\text{Cd}[(\text{SeP}^i\text{Pr}_2)_2\text{N}]_2^3$ .

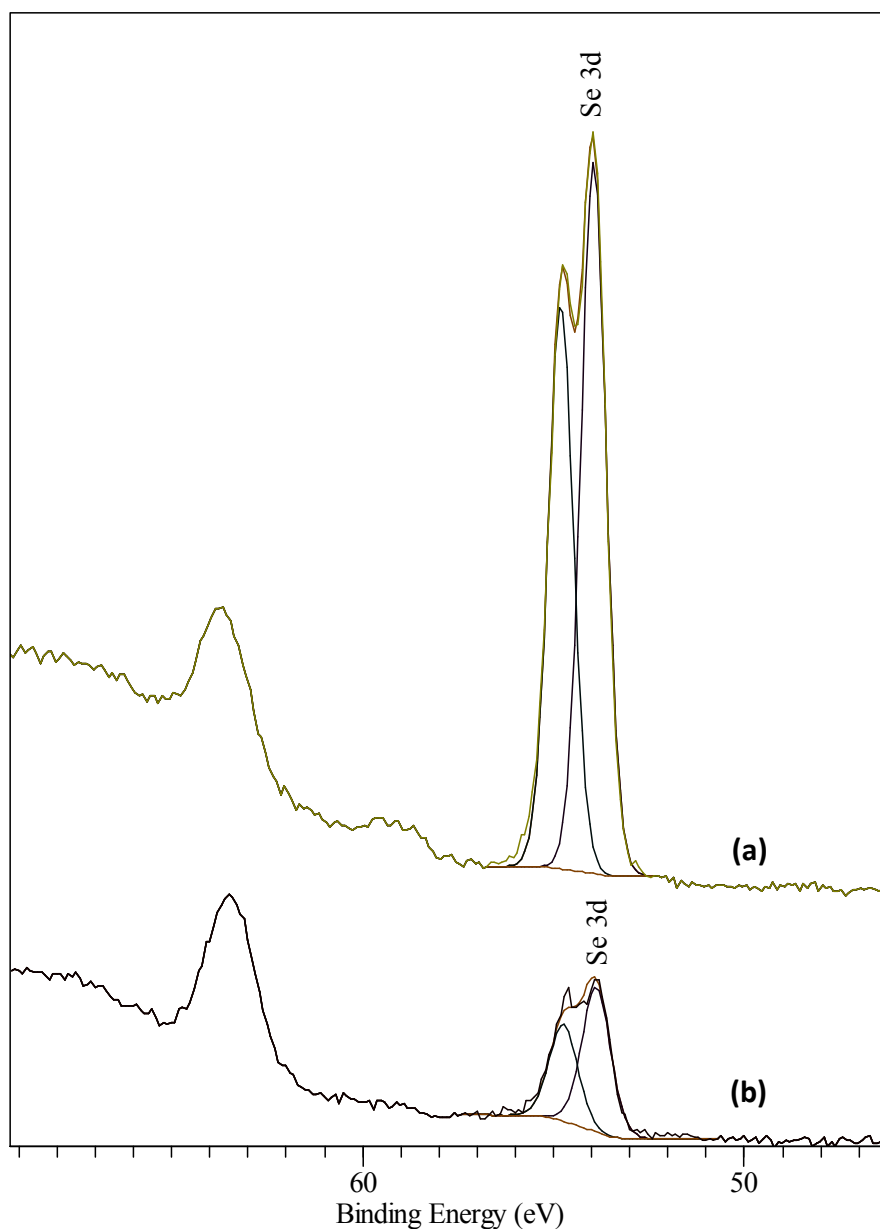

**Figure S3.** XPS of Se 3d peaks of (a)  $\text{Cd}[(\text{SP}^i\text{Pr}_2)(\text{SeP}^i\text{Pr}_2)_2\text{N}]_2$  and (b)  $\text{Cd}[(\text{SeP}^i\text{Pr}_2)_2\text{N}]_2^3$ .

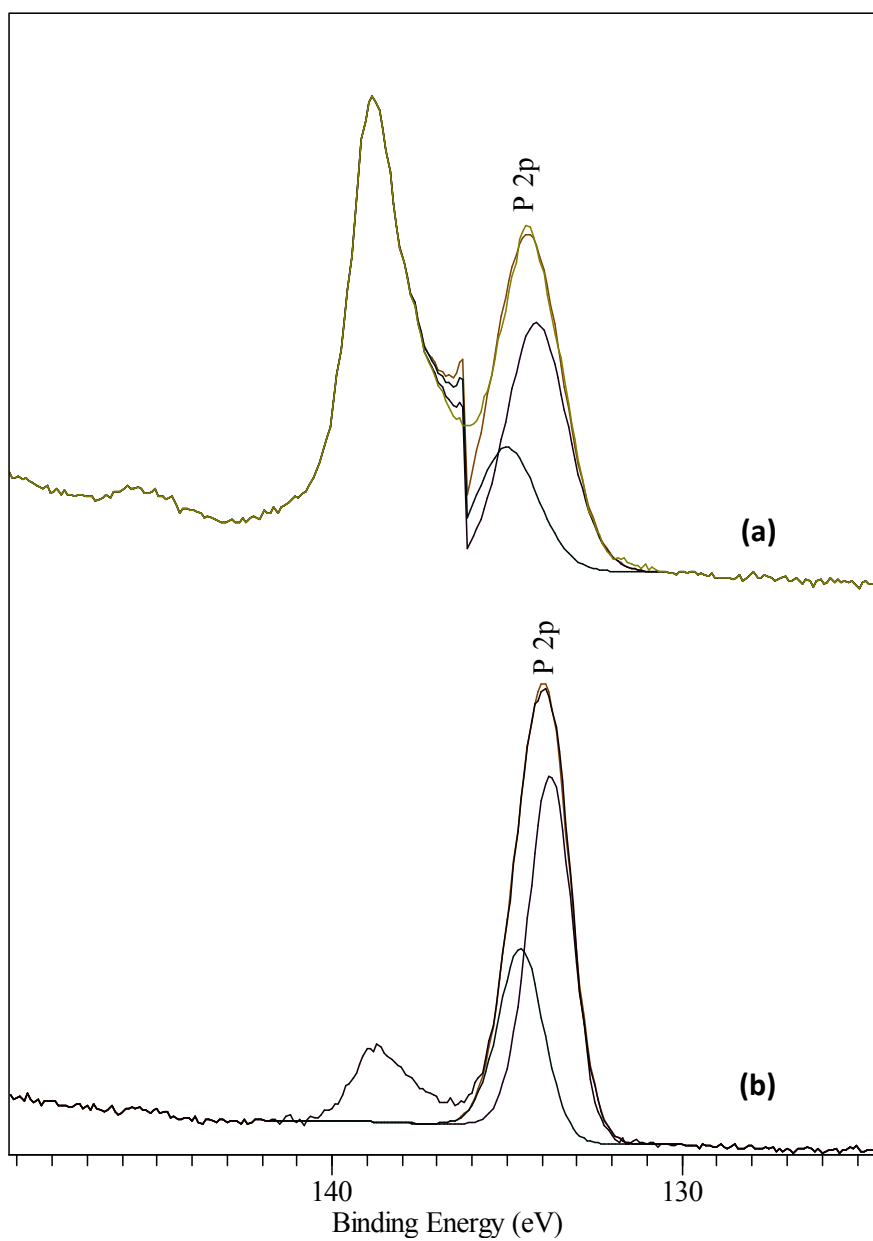

**Figure S4.** XPS of P 2p peaks of (a)  $\text{Cd}[(\text{SP}^i\text{Pr}_2)(\text{SeP}^i\text{Pr}_2)_2\text{N}]_2$  and (b)  $\text{Cd}[(\text{SeP}^i\text{Pr}_2)_2\text{N}]_2^3$ .

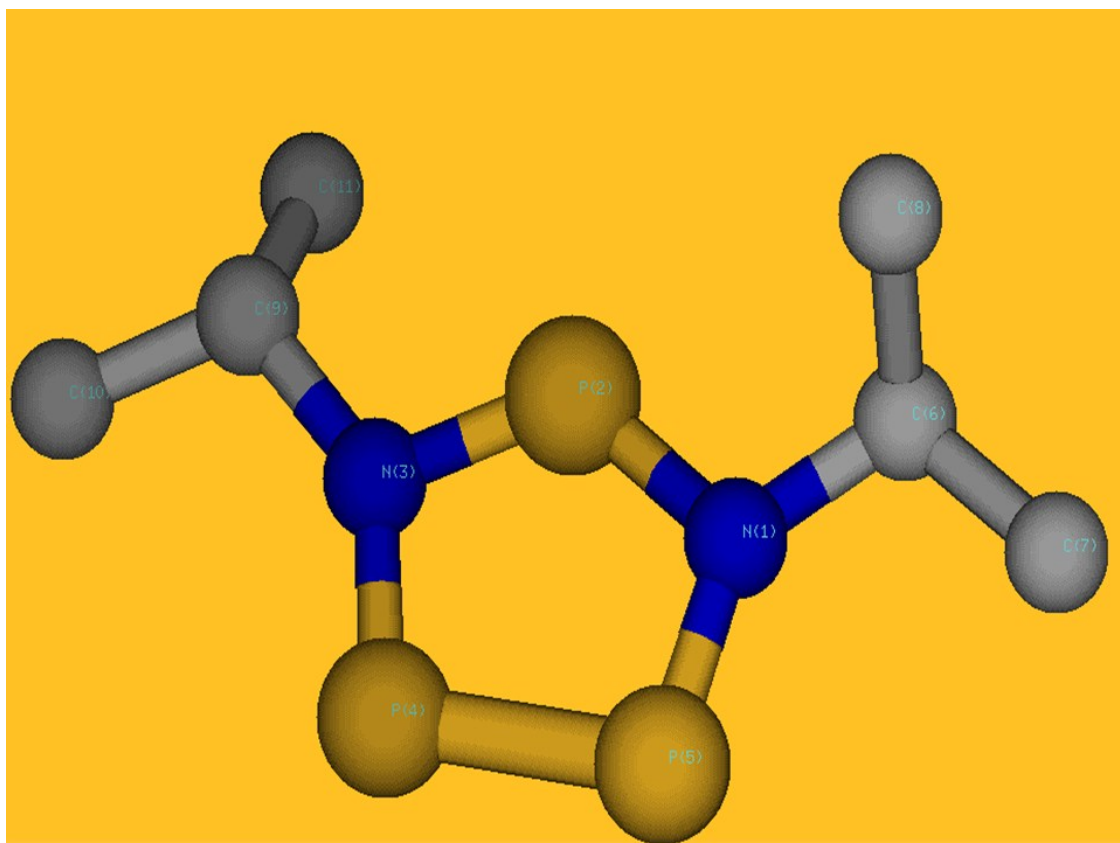

**Figure. S5.** The aromatic ion found in our previous study, at a charge to mass ratio of 207 in the MS. We assigned it this structure due to its stability. For clarity the hydrogens are omitted<sup>4</sup>.

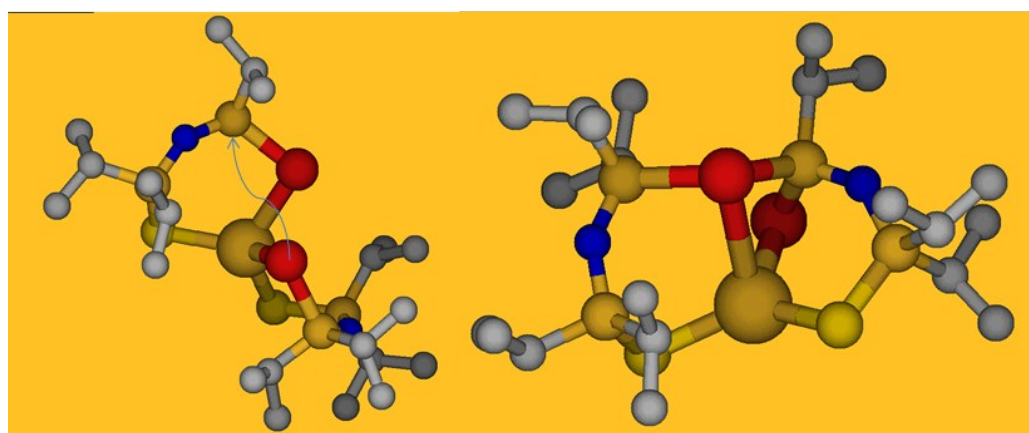

**Figure. S6.** The  $\text{Cd}[(\text{SP}^i\text{Pr}_2)(\text{SeP}^i\text{Pr})\text{N}][(\text{SP}^i\text{Pr}_2)(\text{SeP}^i\text{Pr}_2)\text{N}]^+$  ion, which is the parent ion with the loss of an *iso*-propyl group from P bound to Se (shown in Red). The Se from the other complete ligand attacks the trivalent P as indicated by the arrow in the left image, to yield the structure shown on the right. For clarity the hydrogens have been omitted<sup>4</sup>.

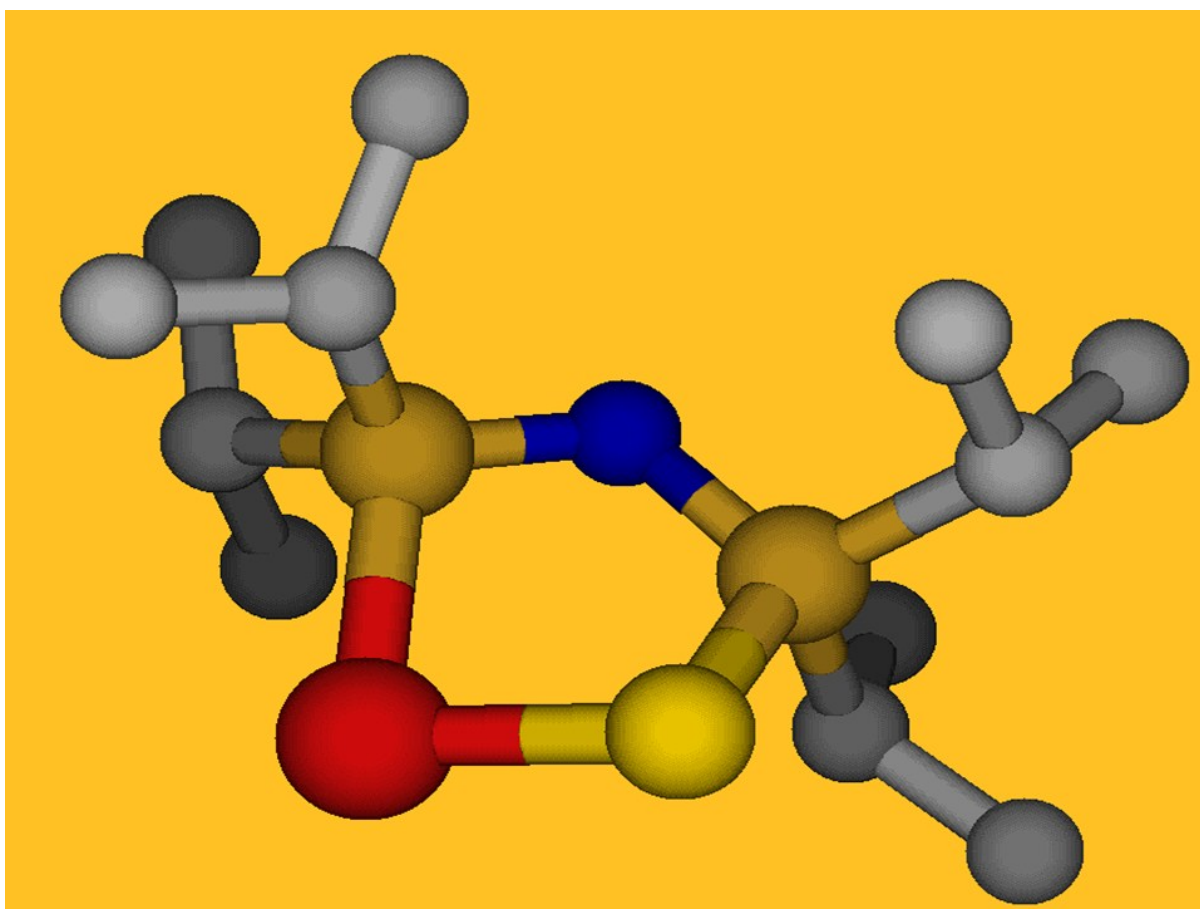

**Figure S7.** The stable ion  $(SPiPr_2)(SePiPr_2)_2N^+$  formed by the loss of an entire ligand from the ionized complex  $Cd[(SPiPr_2)(SePiPr_2)_2N]_2^+$  (formed during MS analysis). Once this ligand has been lost from the complex, it spontaneously cyclized as this results in each element being in a stable valence state. Thus with the positive charge on N, this forms two double bonds to each P and these in turn form two bonds to the *iso*-propyl groups and one bond to either S or Se, giving two five valent P atoms. The Se and S form a bond to each other to complete the cyclization of the ion and to give them two single bonds each. For clarity the hydrogens have been omitted<sup>4</sup>.

**References:**

1. (a) T. Logu, K. Sankarasubramanian, P. Soundarrajan and K. Sethuraman, *Elect. Mater. Lett.*, 2015, **Vol 11, No 2**, 206-212. (b) H. Chauhan, Y. Kumar and S. Deka, *Nanoscale.*, 2014, **6**, 10347-10354.
2. D. Oyetunde, M. Afzaal, M. A. Vincent, I. H. Hillier and P. O'Brien, *Inorg. Chem.*, 2011, **50**, 2052.
3. T. Oyetunde, M. Afzaal, M. A. Vincent and P. O'Brien, *Dalton Trans.*, 2016, **45**, 18603.
4. G. Schaftenaar, E. Vlieg and G. Vriend, "Molden 2.0: quantum chemistry meets proteins", *J Comput Aided Mol. Des.*, **2017**, 31, 789. G.Schaftenaar and J.H. Noordik, "Molden: a pre- and post-processing program for molecular and electronic structures", *J. Comput.-Aided Mol. Design*, 2000, **14**, 123-134.
